# Supplementary material
Source: PubMed Central journal article supplement (PMC7358005)
Supplement: NIHMS1604700-supplement-Kang_et_al_Suppl.pdf [file NIHMS1604700-supplement-Kang_et_al_Suppl.pdf]

# Supplementary Figure 1

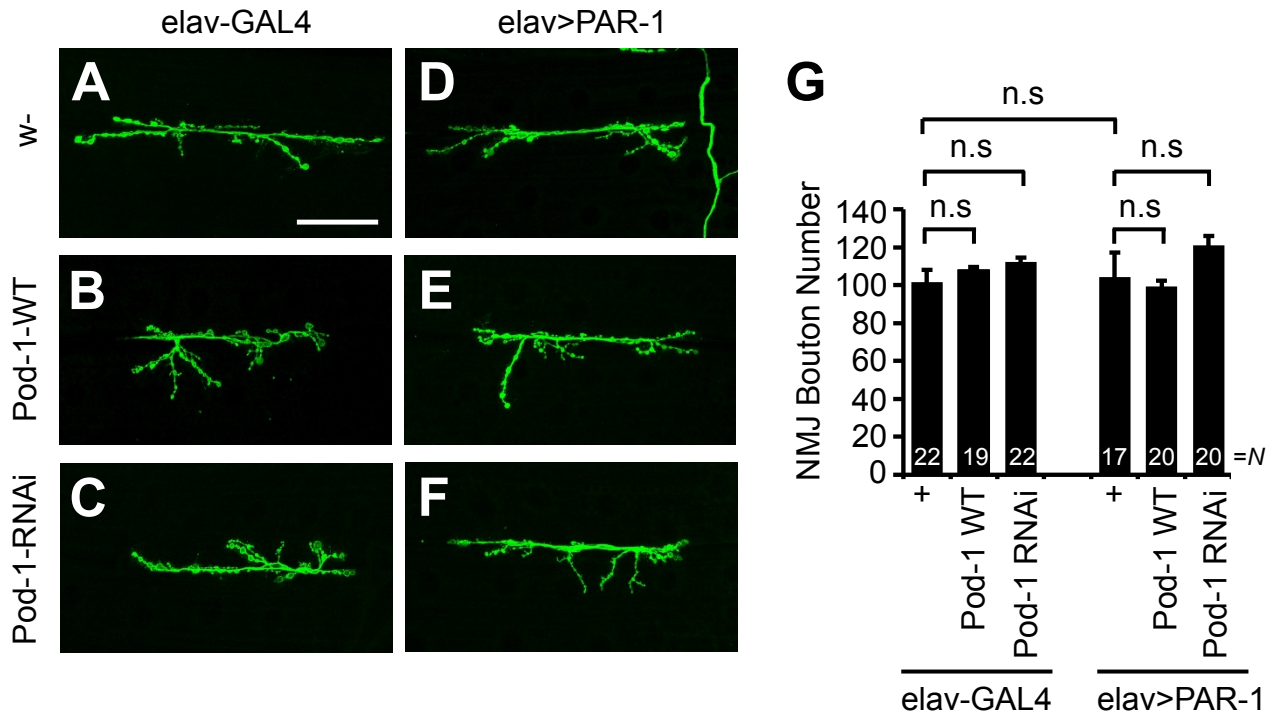

**Supplementary Figure 1.** Non-significant interaction between PAR-1 and Pod-1 at presynaptic compartment. (A-F) Representative NMJ terminals of the indicated genotypes revealed by anti-HRP immunostaining. The genotypes are elav-GAL4/+ control (A), elav-GAL4>UAS-Pod-1-WT (B), elav-GAL4>UAS-Pod-1-RNAi (C), elav-GAL4>UAS-PAR-1 WT (D), elav-GAL4>UAS-PAR-1-WT+UAS-Pod-1-WT (E) and elav-GAL4>UAS-PAR-1-WT+UAS-Pod-1 RNAi (F). Scale bar (A-F), 50  $\mu$ m. (G) Quantification of data observing no effect of genetic interaction between PAR-1 and Pod-1 at presynaptic compartment. N indicates the number of animals analyzed in each group. Statistical significance was determined pairwise using a two-tailed Student's t-test. n.s, not significant.
